# Supplementary material for: Gene copy number variation in natural populations of Plasmodium falciparum in Eastern Africa
Source: PubMed Central journal article supplement (PMC5963192; doi:10.1186/s12864-018-4689-7), 2018-05-21
Supplement: 12864_2018_4689_MOESM1_ESM.pdf [file 12864_2018_4689_MOESM1_ESM.pdf]

| <b>CNV name</b> | <b>Type</b>   | <b>Chromosome</b> | <b>Gene ID</b>  | <b>Annotation</b>                                             | <b>Previous reports</b> |
|-----------------|---------------|-------------------|-----------------|---------------------------------------------------------------|-------------------------|
| <b>cnv1_005</b> | Amplification | 1                 | PF3D7_0108500   | conserved Plasmodium protein, unknown function                | [2]                     |
|                 |               |                   | PF3D7_0108600   | conserved Plasmodium protein, unknown function                | [1,4,7,8-11]            |
| cnv1_007        | Amplification | 1                 | PF3D7_0109400   | tubulin-specific chaperone a, putative                        |                         |
|                 |               |                   | PF3D7_0109500   | N-acetyltransferase, putative                                 |                         |
| <b>cnv2_013</b> | Amplification | 2                 | PF3D7_0202000   | knob-associated histidine-rich protein (KAHRP)                | [1,4,7,8-11]            |
|                 |               |                   | PF3D7_0202100   | liver stage associated protein 2 (LSAP2)                      | [1,2,6]                 |
|                 |               |                   | PF3D7_0202200   | EMP1-trafficking protein (PTP1)                               | [3,6,8]                 |
| cnv2_014        | Amplification | 2                 | PF3D7_0202500   | early transcribed membrane protein 2 (ETRAPM2)                |                         |
|                 |               |                   | PF3D7_0202600.1 | conserved Plasmodium protein, unknown function                |                         |
| cnv2_016        | Amplification | 2                 | PF3D7_0203100   | protein kinase, putative                                      |                         |
| cnv2_023        | Deletion      | 2                 | PF3D7_0212400   | conserved Plasmodium membrane protein, unknown function       |                         |
| cnv2_024        | Amplification | 2                 | PF3D7_0213600   | conserved Plasmodium protein, unknown function                |                         |
| cnv2_028_1      | Amplification | 2                 | PF3D7_0215700   | DNA-directed RNA polymerase II subunit RPB2, putative (RPB2)  |                         |
| cnv2_028_2      | Deletion      | 2                 | PF3D7_0215700   | DNA-directed RNA polymerase II subunit RPB2, putative (RPB2)  |                         |
| cnv3_036        | Amplification | 3                 | PF3D7_0301600   | Plasmodium exported protein (hyp1), unknown function (GEXP21) |                         |
|                 |               |                   | PF3D7_0301700   | Plasmodium exported protein, unknown function                 |                         |
|                 |               |                   | PF3D7_0301800   | Plasmodium exported protein, unknown function                 |                         |
| cnv3_309        | Deletion      | 3                 | PF3D7_0302500   | cytoadherence linked asexual protein 3.1 (CLAG3.1)            |                         |
| cnv3_037        | Amplification | 3                 | PF3D7_0302600   | ABC transporter B family member 4, putative (ABCB4)           |                         |
|                 |               |                   | PF3D7_0302700   | CDGSH iron-sulfur domain-containing protein, putative         |                         |
|                 |               |                   | PF3D7_0302800   | conserved Plasmodium protein, unknown function                |                         |
|                 |               |                   | PF3D7_0302900   | exportin-1, putative                                          |                         |
| <b>cnv3_043</b> | Deletion      | 3                 | PF3D7_0309300   | N2227-like protein, putative                                  | [6]                     |
|                 |               |                   | PF3D7_0309500   | asparagine synthetase, putative                               | [3]                     |
|                 |               |                   | PF3D7_0309600   | 60S acidic ribosomal protein P2 (PfP2)                        |                         |
| cnv3_051        | Deletion      | 3                 | PF3D7_0315200   | circumsporozoite- and TRAP-related protein (CTRP)             |                         |
| cnv3_064        | Amplification | 3                 | PF3D7_0322700   | conserved Plasmodium protein, unknown function                |                         |
| cnv4_073        | Amplification | 4                 | PF3D7_0407000   | conserved Plasmodium protein, unknown function                |                         |
|                 |               |                   | PF3D7_0407100   | methyltransferase, putative                                   |                         |
|                 |               |                   | PF3D7_0407200   | peptidyl-tRNA hydrolase 2, putative (PTH2)                    |                         |
| cnv4_076        | Amplification | 4                 | PF3D7_0409500   | conserved Plasmodium protein, unknown function                |                         |
|                 |               |                   | PF3D7_0409500   | conserved Plasmodium protein, unknown function                |                         |

| CNV name        | Type          | Chromosome | Gene ID       | Annotation                                                          | Previous reports |
|-----------------|---------------|------------|---------------|---------------------------------------------------------------------|------------------|
|                 |               |            | PF3D7_0409600 | replication protein A1, large subunit (RPA1)                        |                  |
|                 |               |            | PF3D7_0409700 | peptide chain release factor 2, putative                            |                  |
| cnv4_078        | Amplification | 4          | PF3D7_0411700 | conserved Plasmodium protein, unknown function                      |                  |
| <b>cnv4_091</b> | Amplification | 4          | PF3D7_0423400 | asparagine-rich protein (AARP)                                      | [10]             |
|                 |               |            | PF3D7_0423500 | glideosome associated protein with multiple membrane spans 2 (GAPM) | [10]             |
| <b>cnv4_092</b> | Amplification | 4          | PF3D7_0424400 | surface-associated interspersed protein 4.2 (SURFIN 4.2) (SURF4.2)  | [4,10]           |
| cnv5_101        | Amplification | 5          | PF3D7_0507900 | conserved Plasmodium protein, unknown function                      |                  |
|                 |               |            | PF3D7_0508000 | 6-cysteine protein (P38)                                            |                  |
|                 |               |            | PF3D7_0508100 | SET domain protein, putative (SET9)                                 |                  |
| cnv5_106        | Amplification | 5          | PF3D7_0512600 | ras-related protein Rab-1B (RAB1b)                                  |                  |
|                 |               |            | PF3D7_0512700 | orotate phosphoribosyltransferase (OPRT)                            |                  |
| cnv5_108        | Amplification | 5          | PF3D7_0514300 | aspartate--tRNA ligase, putative                                    |                  |
|                 |               |            | PF3D7_0514500 | conserved Plasmodium membrane protein, unknown function             |                  |
|                 |               |            | PF3D7_0514600 | ribose 5-phosphate epimerase, putative                              |                  |
| cnv5_109        | Amplification | 5          | PF3D7_0515000 | pre-mRNA-splicing factor CWC2, putative (CWC2)                      |                  |
|                 |               |            | PF3D7_0515100 | rhomboid protease ROM9 (ROM9)                                       |                  |
|                 |               |            | PF3D7_0515200 | conserved Plasmodium protein, unknown function                      |                  |
|                 |               |            | PF3D7_0515300 | phosphatidylinositol 3-kinase (PI3K)                                |                  |
| <b>cnv5_122</b> | Deletion      | 5          | PF3D7_0529000 | conserved Plasmodium protein, unknown function                      | [4]              |
|                 |               |            | PF3D7_0529100 | conserved Plasmodium protein, unknown function                      | [6]              |
|                 |               |            | PF3D7_0529200 | sugar transporter, putative                                         |                  |
| cnv6_125        | Amplification | 6          | PF3D7_0602000 | conserved Plasmodium protein, unknown function                      |                  |
|                 |               |            | PF3D7_0602100 | ATP-dependent RNA helicase, putative                                |                  |
|                 |               |            | PF3D7_0602200 | MYND finger protein, putative                                       |                  |
|                 |               |            | PF3D7_0602300 | liver merozoite formation protein, putative (PALM)                  |                  |
|                 |               |            | PF3D7_0602400 | elongation factor G (EF-G)                                          |                  |
|                 |               |            | PF3D7_0602500 | geranylgeranyltransferase, putative                                 |                  |
| cnv6_127        | Amplification | 6          | PF3D7_0604800 | RAP protein, putative                                               |                  |
|                 |               |            | PF3D7_0604900 | conserved Plasmodium protein, unknown function                      |                  |
|                 |               |            | PF3D7_0605000 | 50S ribosomal protein L24, putative                                 |                  |
|                 |               |            | PF3D7_0605100 | RNA-binding protein, putative                                       |                  |
| cnv6_129        | Amplification | 6          | PF3D7_0606200 | ubiquitin-conjugating enzyme E2, putative                           |                  |

| CNV name        | Type                 | Chromosome | Gene ID              | Annotation                                                  | Previous reports |
|-----------------|----------------------|------------|----------------------|-------------------------------------------------------------|------------------|
|                 |                      |            | PF3D7_0606300        | conserved Plasmodium protein, unknown function              |                  |
|                 |                      |            | PF3D7_0606400        | conserved Plasmodium protein, unknown function              |                  |
|                 |                      |            | PF3D7_0606500        | polypyrimidine tract binding protein, putative              |                  |
| <b>cnv7_169</b> | Amplification        | 7          | PF3D7_0710100        | conserved Plasmodium protein, unknown function              | [4,6,10]         |
|                 |                      |            | PF3D7_0710200        | conserved Plasmodium protein, unknown function              |                  |
| <b>cnv7_181</b> | Amplification        | 7          | PF3D7_0721000        | conserved Plasmodium membrane protein, unknown function     | [10]             |
|                 |                      |            | PF3D7_0721100        | conserved Plasmodium protein, unknown function              |                  |
| cnv7_185        | Amplification        | 7          | PF3D7_0724100        | conserved Plasmodium protein, unknown function              |                  |
|                 |                      |            | PF3D7_0724200        | type 2A phosphatase-associated protein 42, putative (TAP42) |                  |
| cnv7_193        | Deletion             | 7          | PF3D7_0730500        | conserved Plasmodium protein, unknown function              |                  |
| <b>cnv8_201</b> | Deletion             | 8          | PF3D7_0804700        | conserved Plasmodium protein, unknown function              | [6]              |
|                 |                      |            | PF3D7_0804800        | peptidyl-prolyl cis-trans isomerase (CYP24)                 |                  |
|                 |                      |            | PF3D7_0804900        | GTPase-activating protein, putative                         |                  |
|                 |                      |            | PF3D7_0805000        | alpha/beta hydrolase, putative                              |                  |
|                 |                      |            | PF3D7_0805100        | conserved Plasmodium protein, unknown function              |                  |
| <b>cnv8_215</b> | <b>Amplification</b> | <b>8</b>   | <b>PF3D7_0818000</b> | <b>conserved protein, unknown function</b>                  | [6]              |
| cnv8_222        | Deletion             | 8          | PF3D7_0822600        | protein transport protein SEC23 (SEC23)                     |                  |
| cnv8_227        | Deletion             | 8          | PF3D7_0825900        | conserved Plasmodium protein, unknown function              |                  |
|                 |                      |            | PF3D7_0826000        | conserved Plasmodium protein, unknown function              |                  |
| cnv8_233_1      | Deletion             | 8          | PF3D7_0829500        | conserved Plasmodium protein, unknown function              |                  |
| cnv8_233_2      | Amplification        | 8          | PF3D7_0829500        | conserved Plasmodium protein, unknown function              |                  |
| cnv9_235        | Amplification        | 9          | PF3D7_0902900        | conserved Plasmodium protein, unknown function              |                  |
|                 |                      |            | PF3D7_0903000        | conserved protein, unknown function                         |                  |
|                 |                      |            | PF3D7_0903100        | protein RER1, putative (RER1)                               |                  |
| cnv9_242        | Amplification        | 9          | PF3D7_0908000        | P1 nuclease, putative                                       |                  |
|                 |                      |            | PF3D7_0908100        | conserved Plasmodium membrane protein, unknown function     |                  |
| cnv9_249        | Amplification        | 9          | PF3D7_0915200        | ribonuclease H2 subunit C, putative                         |                  |
|                 |                      |            | PF3D7_0915300        | conserved Plasmodium protein, unknown function              |                  |
| cnv9_251        | Amplification        | 9          | PF3D7_0920900        | U4/U6 snRNA-associated-splicing factor, putative (PRP24)    |                  |
|                 |                      |            | PF3D7_0921000.1      | ubiquitin-conjugating enzyme, putative                      |                  |
|                 |                      |            | PF3D7_0921100        | conserved Plasmodium protein, unknown function              |                  |
| cnv9_254        | Deletion             | 9          | PF3D7_0925400        | protein phosphatase-beta                                    |                  |

| CNV name        | Type          | Chromosome | Gene ID         | Annotation                                                       | Previous reports |
|-----------------|---------------|------------|-----------------|------------------------------------------------------------------|------------------|
|                 |               |            | PF3D7_0925500   | thioredoxin-like protein 2 (TLP2)                                |                  |
|                 |               |            | PF3D7_0925600   | zinc binding protein (Yippee), putative                          |                  |
|                 |               |            | PF3D7_0925700   | histone deacetylase 1 (HDAC1)                                    |                  |
| cnv9_255        | Deletion      | 9          | PF3D7_0926400   | monocarboxylate transporter, putative                            |                  |
| cnv9_259        | Deletion      | 9          | PF3D7_0928000.1 | cytochrome c oxidase subunit 6B, putative (COX6B)                |                  |
| cnv9_262        | Amplification | 9          | PF3D7_0928900   | guanylate kinase (GK)                                            |                  |
|                 |               |            | PF3D7_0929000   | transcription initiation factor TFIID subunit 7, putative (TAF7) |                  |
|                 |               |            | PF3D7_0929100   | conserved Plasmodium protein, unknown function                   |                  |
|                 |               |            | PF3D7_0929200   | RNA-binding protein, putative                                    |                  |
|                 |               |            | PF3D7_0929300   | conserved Plasmodium protein, unknown function                   |                  |
| cnv9_268        | Amplification | 9          | PF3D7_0934300   | conserved Plasmodium protein, unknown function                   |                  |
|                 |               |            | PF3D7_0934400   | transcription factor with AP2 domain(s), putative (ApiAP2)       |                  |
| <b>cnv9_269</b> | Deletion      | 9          | PF3D7_0935400   | gametocyte development protein 1 (GDV1)                          | [1,5,6,9,10]     |
|                 |               |            | PF3D7_0935500   | Plasmodium exported protein, unknown function (GEXP22)           | [1,4,6,9,10]     |
|                 |               |            | PF3D7_0935600   | gametocytogenesis-implicated protein (GIG)                       | [1,2,4,6,9,10]   |
|                 |               |            | PF3D7_0935700   | Plasmodium exported protein, unknown function                    | [1,2,4,6,9,10]   |
|                 |               |            | PF3D7_0935800   | cytoadherence linked asexual protein 9 (CLAG9)                   | [1,2,4,6,9,10]   |
|                 |               |            | PF3D7_0935900   | ring-exported protein 1 (REX1)                                   | [1,4,6,9,10]     |
|                 |               |            | PF3D7_0936000   | ring-exported protein 2 (REX2)                                   | [1,2,4,6,9,10]   |
|                 |               |            | PF3D7_0936100   | early transcribed membrane protein (ETRAMP9)                     | [1,2,4,6,9,10]   |
|                 |               |            | PF3D7_0936400   | ring-exported protein 4 (REX4)                                   | [1,2,4,6,9,10]   |
|                 |               |            | PF3D7_0936500   | virulence-associated protein 1 (VAP1)                            | [1,2,4,6,9,10]   |
|                 |               |            | PF3D7_0936700   | lysophospholipase, putative                                      | [1,4,5,9,10]     |
|                 |               |            | PF3D7_0936800   | Plasmodium exported protein (PHISTc), unknown function           | [1,2,4,6,9,10]   |
|                 |               |            | PF3D7_0937000   | Plasmodium exported protein (PHISTb), unknown function           | [1,2,4,6,9,10]   |
|                 |               |            | PF3D7_0937100   | Plasmodium exported protein, unknown function                    | [1,2,4,6,9,10]   |
| cnv10_270       | Deletion      | 10         | PF3D7_1001300   | Plasmodium exported protein (PHISTa), unknown function           |                  |
|                 |               |            | PF3D7_1001400   | alpha/beta hydrolase, putative                                   |                  |
| cnv10_276       | Deletion      | 10         | PF3D7_1008700   | tubulin beta chain                                               |                  |
|                 |               |            | PF3D7_1008800   | nucleolar protein 5, putative (NOP5)                             |                  |
|                 |               |            | PF3D7_1008900   | adenylate kinase (AK1)                                           |                  |
| cnv10_279       | Deletion      | 10         | PF3D7_1012500   | phosphoglucomutase, putative                                     |                  |

| <b>CNV name</b>    | <b>Type</b>   | <b>Chromosome</b> | <b>Gene ID</b> | <b>Annotation</b>                                                     | <b>Previous reports</b> |
|--------------------|---------------|-------------------|----------------|-----------------------------------------------------------------------|-------------------------|
| cnv10_283          | Deletion      | 10                | PF3D7_1016500  | Plasmodium exported protein (PHISTc), unknown function                |                         |
|                    |               |                   | PF3D7_1016700  | Plasmodium exported protein (PHISTc), unknown function                |                         |
| cnv11_304          | Deletion      | 11                | PF3D7_1107300  | polyadenylate-binding protein-interacting protein 1, putative (PAIP1) |                         |
|                    |               |                   | PF3D7_1107400  | DNA repair protein RAD51 (RAD51)                                      |                         |
|                    |               |                   | PF3D7_1107500  | prefoldin, putative                                                   |                         |
| cnv11_313          | Deletion      | 11                | PF3D7_1113800  | conserved Plasmodium membrane protein, unknown function               |                         |
|                    |               |                   | PF3D7_1113900  | mitogen-activated protein kinase 2 (MAPK2)                            |                         |
| cnv11_316          | Deletion      | 11                | PF3D7_1114800  | glycerol-3-phosphate dehydrogenase, putative (G3PDH)                  |                         |
|                    |               |                   | PF3D7_1114900  | conserved Plasmodium protein, unknown function                        |                         |
| <b>cnv11_335</b>   | Amplification | 11                | PF3D7_1128700  | GPI-anchor transamidase (GPI8)                                        |                         |
|                    |               |                   | PF3D7_1128800  | ribosome biogenesis regulatory protein, putative                      |                         |
|                    |               |                   | PF3D7_1128900  | conserved Plasmodium protein, unknown function                        |                         |
|                    |               |                   | PF3D7_1129000  | spermidine synthase (SpdSyn)                                          | [6]                     |
|                    |               |                   | PF3D7_1129100  | parasitophorous vacuolar protein 1 (PV1)                              |                         |
| <b>cnv11_344_1</b> | Deletion      | 11                | PF3D7_1129200  | 26S proteasome regulatory subunit RPN7, putative (RPN7)               |                         |
|                    |               |                   | PF3D7_1140500  | myosin F, putative (MyoF)                                             | [6]                     |
| <b>cnv11_344_2</b> | Amplification | 11                | PF3D7_1140600  | conserved Plasmodium protein, unknown function                        |                         |
|                    |               |                   | PF3D7_1140500  | myosin F, putative (MyoF)                                             | [6]                     |
| cnv11_347          | Amplification | 11                | PF3D7_1140600  | conserved Plasmodium protein, unknown function                        |                         |
|                    |               |                   | PF3D7_1142600  | 60S ribosomal protein L35ae, putative                                 |                         |
|                    |               |                   | PF3D7_1142700  | methyltransferase, putative                                           |                         |
|                    |               |                   | PF3D7_1142800  | conserved Plasmodium protein, unknown function                        |                         |
|                    |               |                   | PF3D7_1142900  | conserved Plasmodium protein, unknown function                        |                         |
| <b>cnv11_348</b>   | Amplification | 11                | PF3D7_1143000  | alpha/beta hydrolase, putative                                        |                         |
|                    |               |                   | PF3D7_1143300  | DNA-directed RNA polymerase I, putative                               |                         |
|                    |               |                   | PF3D7_1143400  | translation initiation factor eIF-1A, putative                        |                         |
| <b>cnv11_354</b>   | Deletion      | 11                | PF3D7_1148700  | Plasmodium exported protein (PHISTc), unknown function (GEXP12)       | [3,4,9,10]              |
|                    |               |                   | PF3D7_1148800  | Plasmodium exported protein (hyp11), unknown function                 | [2,3,4,9]               |
|                    |               |                   | PF3D7_1148900  | Plasmodium exported protein, unknown function                         | [3,4,10]                |
| <b>cnv11_355</b>   | Deletion      | 11                | PF3D7_1149000  | antigen 332, DBL-like protein (Pf332)                                 | [3,4,10]                |
| cnv12_359          | Amplification | 12                | PF3D7_1201700  | conserved Plasmodium membrane protein, unknown function               |                         |
|                    |               |                   | PF3D7_1201800  | cytochrome c oxidase assembly protein COX19, putative (COX19)         |                         |

| <b>CNV name</b>  | <b>Type</b>   | <b>Chromosome</b> | <b>Gene ID</b>  | <b>Annotation</b>                                              | <b>Previous reports</b> |
|------------------|---------------|-------------------|-----------------|----------------------------------------------------------------|-------------------------|
|                  |               |                   | PF3D7_1201900   | conserved protein, unknown function                            |                         |
|                  |               |                   | PF3D7_1202000   | ATP-dependent RNA helicase, putative                           |                         |
| cnv12_360        | Amplification | 12                | PF3D7_1202100.1 | SRAP domain-containing protein, putative                       |                         |
|                  |               |                   | PF3D7_1202200   | mitochondrial phosphate carrier protein                        |                         |
| cnv12_364        | Amplification | 12                | PF3D7_1205400   | conserved Plasmodium protein, unknown function                 |                         |
|                  |               |                   | PF3D7_1205500   | zinc finger protein, putative                                  |                         |
| cnv12_367        | Amplification | 12                | PF3D7_1207000   | conserved Plasmodium protein, unknown function                 |                         |
| cnv12_368        | Deletion      | 12                | PF3D7_1207200   | conserved Plasmodium protein, unknown function                 |                         |
| <b>cnv12_375</b> | Amplification | 12                | PF3D7_1212300   | WD repeat-containing protein, putative                         |                         |
|                  |               |                   | PF3D7_1212400   | tetratricopeptide repeat family protein, putative              | [6]                     |
| cnv12_377        | Deletion      | 12                | PF3D7_1214900   | conserved Plasmodium membrane protein, unknown function        |                         |
|                  |               |                   | PF3D7_1215000   | thioredoxin peroxidase 2 (Trx-Px2)                             |                         |
| cnv12_378        | Amplification | 12                | PF3D7_1216200   | glycerol-3-phosphate dehydrogenase, putative                   |                         |
| cnv12_379        | Amplification | 12                | PF3D7_1217500   | conserved Plasmodium protein, unknown function                 |                         |
|                  |               |                   | PF3D7_1217600   | anaphase promoting complex subunit 10, putative                |                         |
| cnv12_388        | Deletion      | 12                | PF3D7_1229300   | conserved Plasmodium protein, unknown function                 |                         |
|                  |               |                   | PF3D7_1229400   | macrophage migration inhibitory factor (MIF)                   |                         |
|                  |               |                   | PF3D7_1229500   | T-complex protein 1 subunit gamma (CCT3)                       |                         |
| cnv12_398        | Deletion      | 12                | PF3D7_1238900   | protein kinase 2 (PK2)                                         |                         |
| cnv12_405        | Deletion      | 12                | PF3D7_1243700   | ubiquitin-conjugating enzyme E2, putative                      |                         |
| cnv12_408        | Amplification | 12                | PF3D7_1244700   | conserved Plasmodium protein, unknown function                 |                         |
|                  |               |                   | PF3D7_1244800   | cytoplasmic translation machinery associated protein, putative |                         |
| cnv12_409        | Amplification | 12                | PF3D7_1245200   | conserved Plasmodium membrane protein, unknown function        |                         |
| cnv12_413        | Amplification | 12                | PF3D7_1248600   | conserved Plasmodium protein, unknown function                 |                         |
| cnv13_428        | Amplification | 13                | PF3D7_1309000   | conserved Plasmodium protein, unknown function                 |                         |
|                  |               |                   | PF3D7_1309100   | 60S ribosomal protein L24, putative                            |                         |
|                  |               |                   | PF3D7_1309200   | protein phosphatase PPM6, putative (PPM6)                      |                         |
|                  |               |                   | PF3D7_1309300   | U4/U6 small nuclear ribonucleoprotein PRP3, putative (PRPF3)   |                         |
| <b>cnv13_434</b> | Amplification | 13                | PF3D7_1312800   | conserved Plasmodium protein, unknown function                 |                         |
|                  |               |                   | PF3D7_1312900   | eukaryotic translation initiation factor 4 gamma (EIF4G)       |                         |
|                  |               |                   | PF3D7_1313000   | ubiquitin-like protein nedd8 homologue, putative (Nedd8)       |                         |
|                  |               |                   | PF3D7_1313100   | conserved Plasmodium protein, unknown function                 | [6]                     |

| CNV name         | Type          | Chromosome | Gene ID       | Annotation                                                  | Previous reports |
|------------------|---------------|------------|---------------|-------------------------------------------------------------|------------------|
|                  |               |            | PF3D7_1313200 | methionyl-tRNA formyltransferase, putative (MTFMT)          |                  |
| cnv13_437_1      | Deletion      | 13         | PF3D7_1315400 | zinc finger (CCCH type) protein, putative                   |                  |
| cnv13_437_2      | Amplification | 13         | PF3D7_1315400 | zinc finger (CCCH type) protein, putative                   |                  |
| <b>cnv13_441</b> | Amplification | 13         | PF3D7_1316800 | protein transport protein SEC20, putative (SEC20)           | [6]              |
|                  |               |            | PF3D7_1316900 | conserved Plasmodium protein, unknown function              |                  |
|                  |               |            | PF3D7_1317000 | U4/U6.U5 tri-snRNP-associated protein 2, putative (USP39)   |                  |
| cnv13_442        | Amplification | 13         | PF3D7_1317300 | conserved Plasmodium protein, unknown function              |                  |
|                  |               |            | PF3D7_1317400 | conserved Plasmodium protein, unknown function              |                  |
| cnv13_447        | Deletion      | 13         | PF3D7_1322300 | translation initiation factor EIF-2B subunit related        |                  |
| cnv13_453        | Deletion      | 13         | PF3D7_1324900 | L-lactate dehydrogenase (LDH)                               |                  |
|                  |               |            | PF3D7_1325000 | U6 snRNA-associated Sm-like protein LSm6, putative (LSM6)   |                  |
| cnv13_457        | Amplification | 13         | PF3D7_1329200 | conserved Plasmodium protein, unknown function              |                  |
|                  |               |            | PF3D7_1329300 | chromatin assembly factor 1 subunit, putative               |                  |
| cnv13_469        | Deletion      | 13         | PF3D7_1340400 | conserved Plasmodium protein, unknown function              |                  |
| cnv13_473_1      | Deletion      | 13         | PF3D7_1344600 | lipoyl synthase (LipA)                                      |                  |
| cnv13_473_2      | Amplification | 13         | PF3D7_1344600 | lipoyl synthase (LipA)                                      |                  |
| cnv13_478        | Amplification | 13         | PF3D7_1348800 | E1-E2 ATPase, putative                                      |                  |
|                  |               |            | PF3D7_1348900 | conserved Plasmodium protein, unknown function              |                  |
|                  |               |            | PF3D7_1348900 | conserved Plasmodium protein, unknown function              |                  |
|                  |               |            | PF3D7_1349000 | conserved Plasmodium protein, unknown function              |                  |
| cnv13_482        | Amplification | 13         | PF3D7_1351200 | conserved Plasmodium protein, unknown function              |                  |
| <b>cnv13_503</b> | Amplification | 13         | PF3D7_1366400 | rhoptyr protein RHOP148 (RHOP148)                           | [10]             |
|                  |               |            | PF3D7_1366500 | nucleoside diphosphate kinase (NDK)                         |                  |
| <b>cnv14_516</b> | Amplification | 14         | PF3D7_1412400 | conserved Plasmodium protein, unknown function              | [4]              |
| cnv14_517        | Amplification | 14         | PF3D7_1412500 | actin II (ACT2)                                             |                  |
| cnv14_541        | Amplification | 14         | PF3D7_1431600 | ATP-specific succinyl-CoA synthetase beta subunit, putative |                  |
| cnv14_543        | Deletion      | 14         | PF3D7_1432200 | conserved Plasmodium protein, unknown function              |                  |
|                  |               |            | PF3D7_1432200 | conserved Plasmodium protein, unknown function              |                  |
| cnv14_549        | Amplification | 14         | PF3D7_1438800 | conserved Plasmodium protein, unknown function              |                  |
|                  |               |            | PF3D7_1438900 | thioredoxin peroxidase 1 (Trx-Px1)                          |                  |
|                  |               |            | PF3D7_1439000 | copper transporter                                          |                  |
| cnv14_564        | Amplification | 14         | PF3D7_1452700 | U1 snRNA associated protein, putative                       |                  |

| <b>CNV name</b> | <b>Type</b>   | <b>Chromosome</b> | <b>Gene ID</b> | <b>Annotation</b>                                    | <b>Previous reports</b> |
|-----------------|---------------|-------------------|----------------|------------------------------------------------------|-------------------------|
|                 |               |                   | PF3D7_1452800  | conserved Plasmodium protein, unknown function       |                         |
| cnv14_573       | Amplification | 14                | PF3D7_1460700  | 60S ribosomal protein L27 (RPL27)                    |                         |
|                 |               |                   | PF3D7_1460800  | snRNA-activating protein complex subunit 3, putative |                         |

**Additional File 1. CNVs found in this study.** Those marked in bold have been reported previously. CNVs showing both a deletion and amplification allele are listed separately.

## References

1. Carret CK, Horrocks P, Konfortov B, Winzeler EA, Qureshi M, Newbold CI, Ivens A: Microarray-based comparative genomic analyses of the human malaria parasite *Plasmodium falciparum* using Affymetrix arrays. *Molecular and Biochemical Parasitology* 2005;144:177-186.
2. Cheeseman IH, Gomez-Escobar N, Carret CK, Ivens A, Stewart LB, Tetteh KK, Conway DJ: Gene copy number variation throughout the *Plasmodium falciparum* genome. *BMC Genomics* 2009;10:353.
3. Cheeseman IH, Miller B, Tan JC, Tan A, Nair S, Nkhoma SC, De Donato M, Rodulfo H, Dondorp A, Branch OH et al: Population structure shapes copy number variation in malaria parasites. *Mol Biol Evol* 2016;33:603-620.
4. Jiang H, Yi M, Mu J, Zhang L, Ivens A, Klimczak LJ, Huyen Y, Stephens RM, Su XZ: Detection of genome-wide polymorphisms in the AT-rich *Plasmodium falciparum* genome using a high-density microarray. *BMC Genomics* 2008;9:398.
5. Kidgell C, Volkman SK, Daily JP, Borevitz JO, Plouffe D, Zhou Y, Johnson JR, Le Roch KG, Sarr O, Ndir O et al: A systematic map of genetic variation in *Plasmodium falciparum*. *PLoS Pathog* 2006;2 e57.
6. Mackinnon MJ, Li J, Mok S, Kortok MM, Marsh K, Preiser PR, Bozdech Z: Comparative transcriptional and genomic analysis of *Plasmodium falciparum* field isolates. *PLoS Pathog* 2009;5:e1000644.
7. Pologe LG, Ravetch JV: Large deletions result from breakage and healing of *P. falciparum* chromosomes. *Cell* 1988;55:869-874.
8. Ribacke U, Mok BW, Wirta V, Normark J, Lundeberg J, Kironde F, Egwang TG, Nilsson P, Wahlgren M: Genome wide gene amplifications and deletions in *Plasmodium falciparum*. *Molecular and Biochemical Parasitology* 2007;155:33-44.
9. Samarakoon U, Gonzales JM, Patel JJ, Tan A, Checkley L, Ferdig MT: The landscape of inherited and de novo copy number variants in a *Plasmodium falciparum* genetic cross. *BMC Genomics* 2011;12:457.
10. Samarakoon U, Regier A, Tan A, Desany BA, Collins B, Tan JC, Emrich SJ, Ferdig MT: High-throughput 454 resequencing for allele discovery and recombination mapping in *Plasmodium falciparum*. *BMC Genomics* 2011;12:116.
11. Scherf A, Mattei D: Cloning and characterization of chromosome breakpoints of *Plasmodium falciparum*: breakage and new telomere formation occurs frequently and randomly in subtelomeric genes. *Nucleic Acids Research* 1992;20 1491-1496.
